# Supplementary material for: In-Silico Evaluation of Anthropomorphic Measurement Variations on Electrical Cardiometry in Neonates
Source: MDPI journal article supplement (doi:10.3390/children8100936), 2021-10-18
Supplement: s1 [file s1]

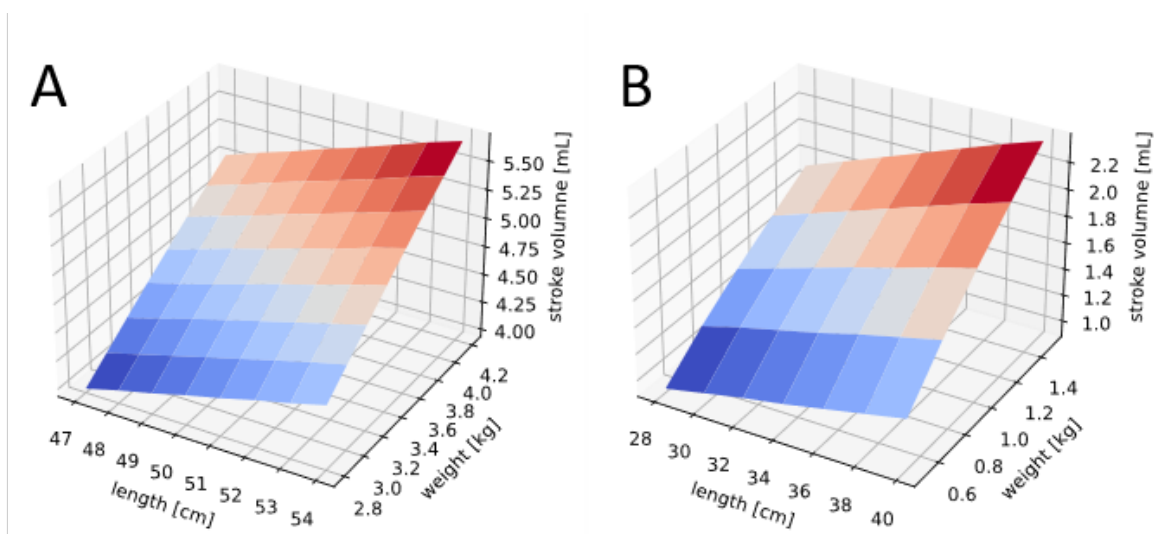

**Figure S1.** (online supplemental) 3D- Visualisation of raw data (A) Term (B) preterm stroke volume, length and weight.

**Table S1.** (online supplemental): Relative stroke volume estimates for term infants.

| Length[cm]/<br>Weight[kg] | 3.0 | 3.2 | 3.4 | 3.6 | 3.8 | 4.0 | 4.2 |
|---------------------------|-----|-----|-----|-----|-----|-----|-----|
| 48                        | 85  | 88  | 92  | 95  | 98  | 101 | 104 |
| 49                        | 87  | 90  | 93  | 97  | 100 | 103 | 105 |
| 50                        | 88  | 92  | 95  | 98  | 101 | 104 | 107 |
| 51                        | 90  | 93  | 97  | 100 | 103 | 106 | 109 |
| 52                        | 92  | 95  | 98  | 102 | 105 | 108 | 111 |
| 53                        | 93  | 97  | 100 | 104 | 107 | 110 | 113 |
| 54                        | 95  | 98  | 102 | 105 | 109 | 112 | 115 |

Stroke volumes represented as a proportion of the result for a term infant of median length and weight (3.6 kg and 51 cm = 100%).

**Table S2.** (online supplemental): Relative Stroke volume estimates for preterm infants.

| Length[cm]/<br>Weight[kg] | 0.5 | 0.75 | 1.0 | 1.25 | 1.5 |
|---------------------------|-----|------|-----|------|-----|
| 28                        | 56  | 71   | 83  | 95   | 106 |
| 30                        | 60  | 75   | 89  | 101  | 113 |
| 32                        | 63  | 80   | 94  | 107  | 120 |
| 34                        | 66  | 84   | 100 | 113  | 126 |
| 36                        | 70  | 89   | 105 | 120  | 133 |
| 38                        | 74  | 93   | 110 | 126  | 140 |
| 40                        | 77  | 98   | 115 | 131  | 146 |

Stroke volumes represented as a proportion of the result for a preterm infant of median length and weight (1.0 kg and 34 cm = 100%).
